# Supplementary material for: Prevalence and Associated Risk Factors of Intestinal Parasites among Children under Five Years of Age Attended at Bachuma Primary Hospital, West Omo Zone, Southwest Ethiopia: A Cross-Sectional Study
Source: Hindawi journal article supplement (doi:10.1155/2023/2268554), 2023-05-05
Supplement: f1 [file 2268554.f1.pdf]

## ANNEX-I: English Questionnaire

Mizan Tepi University College of Medicine and Health Sciences College Department of Medical Laboratory Sciences.

This questionnaire is prepared to assess the prevalence of intestinal parasite infection among children five years who attended at Bachuma primary hospital, October to December, 2022. So, you are invited to give valuable information about your child and I also guaranteed all information you give for this study will be kept confidential. Finally, I ask your cooperation and patience until I finish my question.

Are you voluntary? A. Yes  B. No

### Data collection format Part-I: Participant identification

1. Age \_\_\_\_\_
2. Sex A. Male  B. Female
3. Residence A. Urban  B. Rural
4. Educational status of parents or guardians  
A. 1-4  B. 5-8   
B. 9-12  D. Diploma and above
5. Occupational status of parents or guardian  
A. Farmers  D. Daily laborer  G. Others   
B. Housewives  E. Merchant   
C. Student  F. Employed
6. Monthly income of the parents/guardians  
A. < 500 birrs  C. 1001- 2000 birrs   
B. 500-1000 birrs  D. > 2000 birrs

### Part II: Associated factors

7. Floor of the house and the compound in which the child play  
A. cemented  B. made of mud/uncemented
8. Did you wash your hand with soap and clean water before meal?  
A. Yes  B. No
9. Did you wash your hands after toilet?

A. Yes  B. No

10. Has your child infected with intestinal parasite before?

A. Yes  B. No

11. If yes, how long it was? A. < 2 weeks  B. > 2 weeks   
C. < 1month  D. > 1month

12. Child's finger nail trimmed/cut short

A. Yes  B. No

13. Vegetables/Fruits was eaten

A. Washed well  B. Not washed

14. Have your child get treated for GIT infection before?

A. Yes  B. No

15. Did your child have abdominal pain problem?

A. Yes  B. No

16. Did your child was a diabetic Patient?

A. Yes  B. No

17. Did your child take any medication in the last 15 days?

A. Yes  B. No

18. If yes what type of drug? A. Antihelminth  B. Antiprotozoal  C. Antibiotics

19. Source of water for drink for the family

A. Stream  B. Pond  C. Pipe water  D. Others
